# Supplementary material
Source: HighWire-hosted journal article supplement (https://www.jneurosci.org/highwire/filestream/599406/field_highwire_adjunct_files/0/supplemental_material.pdf)
Supplement: supplemental_material.pdf [file supplemental_material.pdf]

**Supplemental Material:****Affective learning enhances visual detection and responses in primary visual cortex**

We probed fMRI responses in three additional ROIs: inferior temporal gyrus (ITG), intraparietal sulcus (IPS), and the auditory cortex surrounding Heschel's gyrus. Selective averaging was performed in terms of the factors CONDITION (CS+ and CS-), TARGET (present and absent), and ACCURACY (correct and incorrect) and the results are shown in Figures S1 and S2 below. Separate repeated-measures ANOVAs were performed in terms of CONDITION and TARGET and CONDITION and ACCURACY. The results are displayed in the tables below. Overall, the results were quite different from those observed in retinotopically organized visual areas, for which a robust statistical interaction was present.

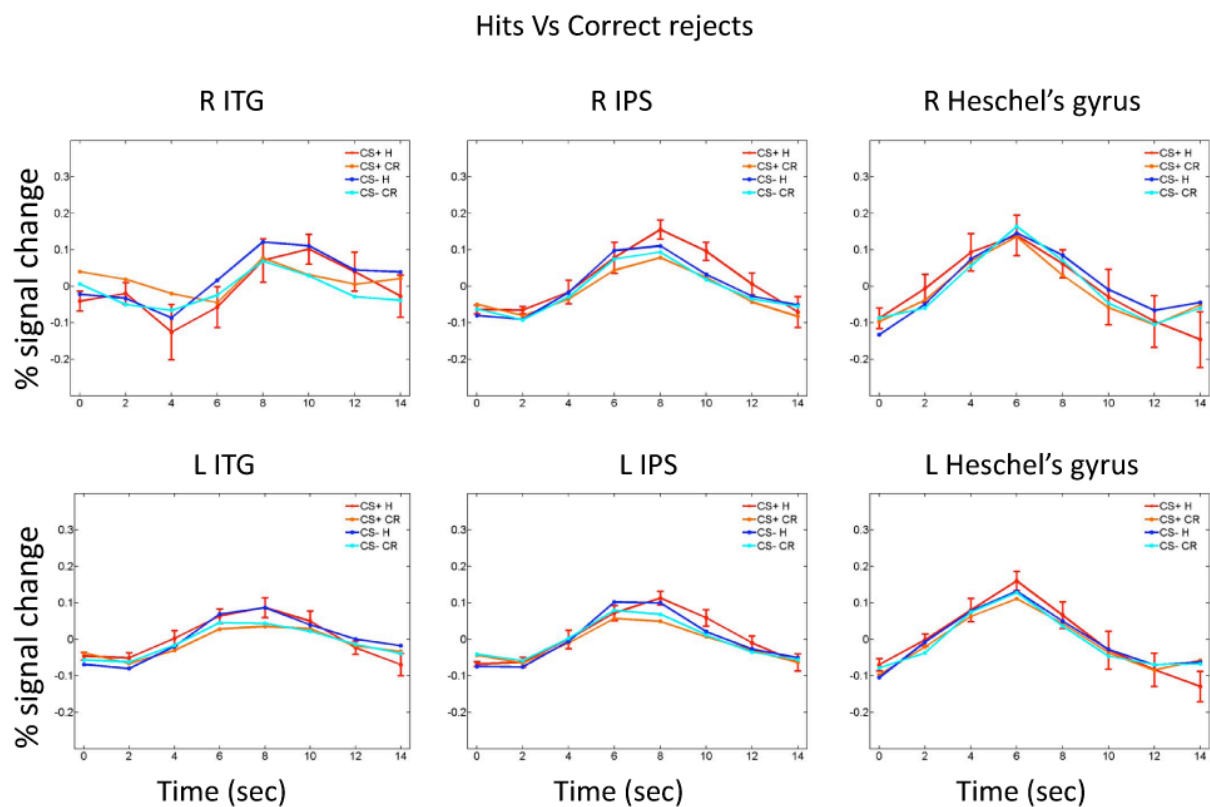

**Figure S1.** Average single-trial responses for additional ROIs for hits and correct rejects (N = 9). Error bars indicate standard error of the mean and are shown for one condition to maximize clarity. IPS: inferior parietal sulcus; ITG: inferior temporal gyrus; H: hits; CR: correct rejects; R: right, L: left.

## Hits Vs Misses

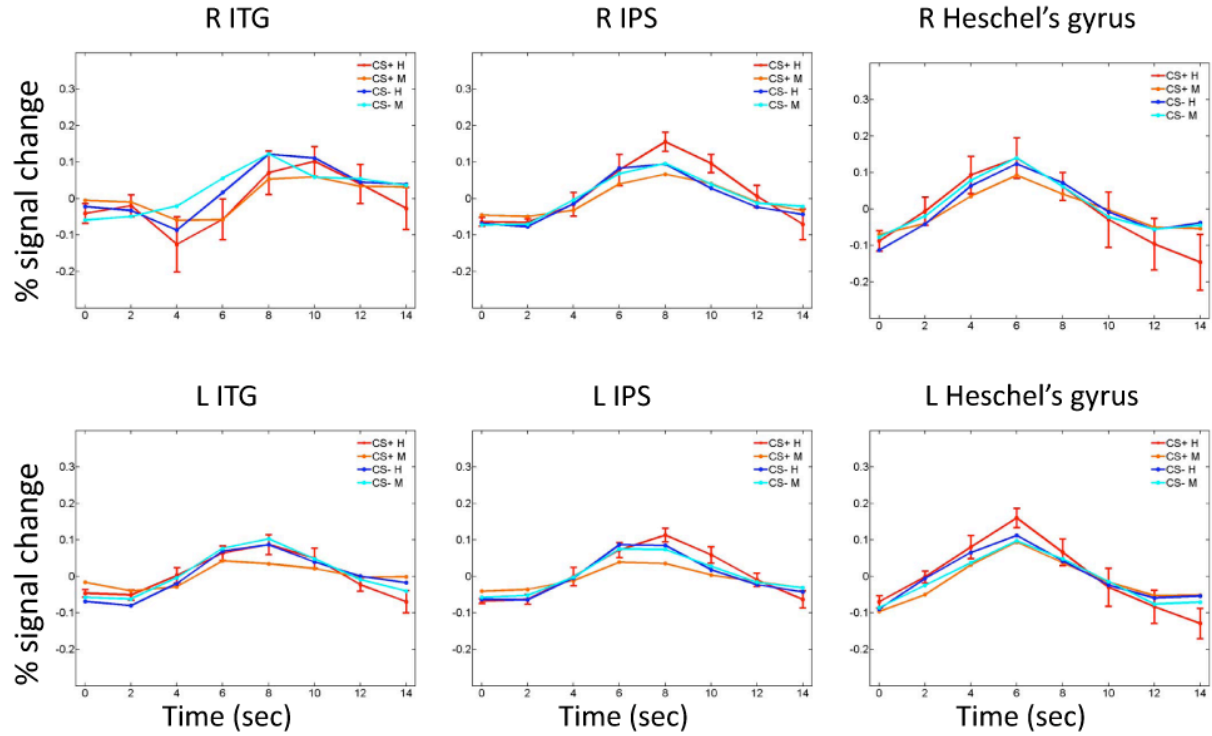

Supplementary Figure 2

**Figure S2.** Average single-trial responses for additional ROIs for hits and misses (N = 9). Error bars indicate standard error of the mean and are shown for one condition to maximize clarity. IPS: inferior parietal sulcus; ITG: inferior temporal gyrus; H: hits; M: misses; R: right, L: left.

**Condition by Target analysis**

|                   | CONDITION main effect | TARGET main effect | CONDITION X TARGET interaction |
|-------------------|-----------------------|--------------------|--------------------------------|
| ITG L             | n.s                   | <b>0.001</b>       | n.s.                           |
| ITG R             | n.s                   | n.s                | n.s                            |
| IPS L             | n.s.                  | <b>0.002</b>       | n.s                            |
| IPS R             | n.s.                  | 0.053*             | n.s                            |
| Heschel's gyrus L | n.s.                  | n.s.               | n.s                            |
| Heschel's gyrus R | n.s                   | n.s                | n.s                            |

\*Does not meet the  $p = .05$  significance threshold but shows statistical trend ( $p < .1$ ).

n.s. : not statistically significant.

**Condition by Accuracy analysis**

|                   | CONDITION main effect | ACCURACY main effect | CONDITION X ACCURACY Interaction |
|-------------------|-----------------------|----------------------|----------------------------------|
| ITG L             | n.s                   | 0.09*                | n.s.                             |
| ITG R             | n.s                   | n.s                  | n.s                              |
| IPS L             | n.s.                  | <b>0.004</b>         | n.s                              |
| IPS R             | n.s.                  | <b>0.008</b>         | n.s                              |
| Heschel's gyrus L | n.s.                  | n.s.                 | n.s                              |
| Heschel's gyrus R | n.s                   | n.s                  | n.s                              |

\*Does not meet the  $p = .05$  significance threshold but shows statistical trend ( $p < .1$ ).

n.s. : not statistically significant.
